# Supplementary material for: Awn Stem-Derived High-Activity Free-Metal Porous Carbon for Oxidation Reduction
Source: MDPI journal article supplement (doi:10.3390/molecules26196071), 2021-10-08
Supplement: s1 [file s1]

# Awn Stem-Derived High-Activity Free-Metal Porous Carbon for Oxidation Reduction

Qingyun Zhao <sup>1,2</sup>, Shikai Wen <sup>1,2</sup> and Junhua Hou <sup>1,2,3,\*</sup>

<sup>1</sup> School of Physics and Information Engineering, Shanxi Normal University, No.1 Gongyuan Road, Yaodu District, Linfen 041004, China; sxlfzqy@sohu.com (Q.Z.); 218110019@stu.sxnu.edu.cn (S.W.)

<sup>2</sup> Modern College of Humanities and Sciences, Shanxi Normal University, No.657 Jiefang East Road, Yaodu District, Linfen 041000, China

<sup>3</sup> Extreme optical Collaborative Innovation Center, Shanxi University, No. 92, Wucheng Road, Xiaodian District, Taiyuan 030006, China

\* Correspondence: jhhou@126.com or jhhou@sxnu.edu.cn; Tel.: +86-357-2051395

## Electrochemical measurements

All ORR performance was measured with a conventional three-electrode system at room temperature, wherein the reference electrode is an Ag/AgCl electrode (saturated KCl solution), the contrast electrode is a graphite bar and the working electrode is rotating the disc electrode (Glass carbon electrode, GC,  $d = 5\text{ mm}$ ). Before the experiment, graphite electrode and glass disc rotating disk (RDE, diameter = 5 mm, area =  $0.1963\text{ cm}^2$ ) were placed in 0.05mm of aluminum powder, then cleaned in an ultrasonic instrument, and finally washed with deionized water for a few minutes.

The ink preparation method is 5mg of catalyst, 50  $\mu\text{L}$  of Nafion solution, 250  $\mu\text{L}$  of isopropanol and 700  $\mu\text{L}$  of deionized water were mixed in a 1.5mL centrifugation tube. The tube is first placed in the ultrasonic instrument for 1 hour to forming a homogeneously mixed catalytic ink. Finally, then evenly disperse 10  $\mu\text{L}$  of suspension droplets on the electrode surface and dry naturally (the average catalyst load was  $0.25\text{ mg cm}^{-2}$ ). The 20wt % Pt/C electrode was prepared by the same method.

ORR electrochemical tests include circulating voltammetry (CV), linear scanning voltage (LSV) and current-time (I-t) chronoamperes with rotating disk electrode (RDE)

and the Autolab electrochemical work station. Convert all potentials to the potential of standard reversible hydrogen electrodes (RHE) by the following equation (equation (1)):

$$E_{(RHE)} = E_{(Ag/AgCl)} + E_{(Ag/AgCl)}^{\theta} + 0.059pH \quad (1)$$

The cycle voltammetry (CV) measurement were carried out in 0.1 M KOH solution saturated with N<sub>2</sub> or O<sub>2</sub>, ranging from 0.2 to 1.2V (vs RHE) at a rate of 50 mV/s. The linear scanning voltammetry (LSV) of the catalyst were tested by the rotating disk electrode (RDE) at different speeds of 400 to 2500 rpm and the scan rate is 10 mV/s. Finally the Kentucky-Lecich (K-L) spectrum is obtained by the corresponding RDE data, and the number of electron transfer during the ORR process is calculated by the K-L equation (equation (2) and (3)):

$$\frac{1}{J} = \frac{1}{J_K} + \frac{1}{B\omega^{1/2}} \quad (2)$$

$$B = 0.62nFC_0(D_0)^{2/3}(\nu)^{-1/6} \quad (3)$$

Where J represents the current density and J<sub>K</sub> represents the kinetic-limiting current density in RDE, respectively. The  $\omega$  represents the angular rate of the working electrode. Where n is the number of transfer electrons, f is the normal constant of Faraday (F = 96485 C mol<sup>-1</sup>), C<sub>0</sub> (C<sub>0</sub> = 1.2\*10<sup>-6</sup> mol cm<sup>-3</sup> for 0.1 M KOH) and D<sub>0</sub> (D<sub>0</sub> = 1.9\*10<sup>-5</sup> cm<sup>2</sup> s<sup>-1</sup>) is a bulk and diffusion coefficient in 0.1 M KOH of O<sub>2</sub>. And  $\nu$  is the electrolyte motion viscosity ( $\nu$  = 0.01 cm<sup>2</sup> s<sup>-1</sup> in 0.1 M KOH). In addition, when rpm is a speed unit, a constant of 0.2 is applied.

The number of electron transfer during the inverse rate of the catalyst and the yield of hydrogen peroxide was measured in 0.1 M O<sub>2</sub>-saturated KOH solution with a rotary annular disc electrode (RRDE) at 1600 rpm rotation rate and a scan rate of 50 mV/s.

Then, the  $n$  and  $\text{H}_2\text{O}_2$  yields are calculated by the following formula (equation (4) and (5)):

$$n = 4 \times \frac{I_d}{I_d + I_r/N} \quad (4)$$

$$\% \text{HO}_2^- = 200 \times \frac{I_r/N}{I_d + I_r/N} \quad (5)$$

Where  $I_d$  is a disk current,  $I_r$  is a ring current.  $N$  ( $N = 0.37$ ) is the current collection efficiency of the Pt ring.

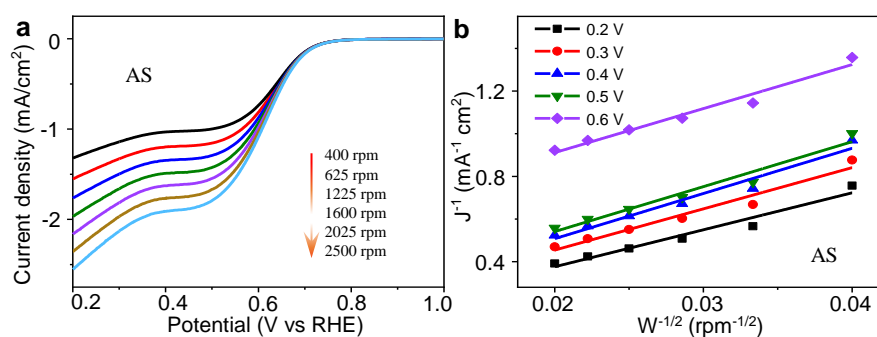

**Figure S1** The LSV curves at different rotation rates from 400 to 2500 rpm of AS (a), corresponding to the K-L plots of AS from 0.2 to 0.6 V (b), respectively.

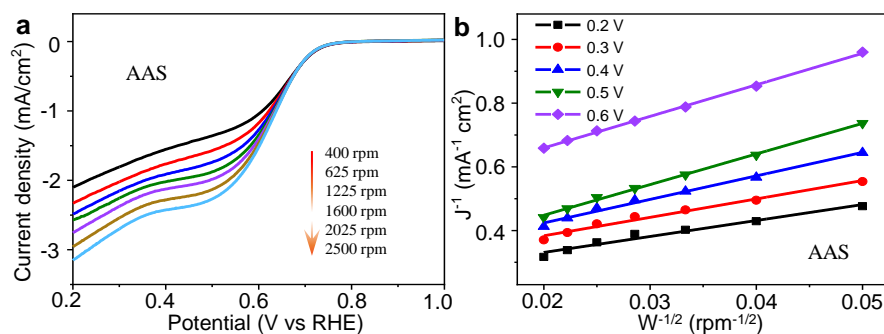

**Figure. S2** The LSV curves at different rotation rates from 400 to 2500 rpm of AAS (a), corresponding to the K-L plots of AAS from 0.2 to 0.6 V (b), respectively.

**Table S1.** Synthesis process of catalyst AS, AAS and TAAS.

| catalyst | Synthesis |
|----------|-----------|
| AS       | c         |

|    |                                                                                                                                                        |            |
|----|--------------------------------------------------------------------------------------------------------------------------------------------------------|------------|
|    | AAS                                                                                                                                                    | a and c    |
|    | TAAS                                                                                                                                                   | a, b and c |
| a. | Awn stem were activated in 1M KOH solution at 60 °C for 48 h;                                                                                          |            |
| b. | Activated awn stem powder and trithiocyanuric acid were mixed in 50 mL of deionized water at a mass ratio of 1:3, stirred at room temperature for 2 h; |            |
| c. | High temperature carbonization at 550 °C for 4 h in N <sub>2</sub> atmosphere and heated to 900 °C for 2 h.                                            |            |

**Table S2.** Physical properties and the charge transfer impedance of AS, AAS and TAAS.

| Samples | S <sub>BET</sub> (m <sup>2</sup> g <sup>-1</sup> ) | Pore volume (cm <sup>3</sup> g <sup>-1</sup> ) | Pore Size (nm) | I <sub>D</sub> /I <sub>G</sub> | R <sub>ct</sub> (Ω) |
|---------|----------------------------------------------------|------------------------------------------------|----------------|--------------------------------|---------------------|
| AS      | 21.38                                              | 0.016                                          | 2.96           | 1.01                           | 390                 |
| AAS     | 48.86                                              | 0.024                                          | 3.52           | 1.11                           | 480                 |
| TAAS    | 191.04                                             | 0.13                                           | 2.59           | 1.18                           | 550                 |

**Table S3.** The content of C, N, O, and S elements and N configuration calculated of AS, AAS and TAAS from elemental analysis and XPS.

| Samples | Elemental content (at. %) |      |      |       | N configuration (%) |            |             |            |
|---------|---------------------------|------|------|-------|---------------------|------------|-------------|------------|
|         | C 1s                      | N 1s | S 2p | O 1s  | pyridinic-N         | pyrrolic-N | graphitic-N | oxidized-N |
| AS      | 87.02                     | 1.47 | 0.22 | 11.29 | 16.0                | 36.5       | 36.1        | 11.3       |
| AAS     | 88.25                     | 1.34 | 0.82 | 9.59  | 17.8                | 34.8       | 34.5        | 12.9       |
| TAAS    | 80.35                     | 9.84 | 1.4  | 8.41  | 36.5                | 26.3       | 30.9        | 6.2        |
